# Supplementary material for: Next-generation poly-L-histidine formulations for miRNA mimic delivery
Source: PubMed Central journal article supplement — Mol Ther Methods Clin Dev. 2023 Apr 1;29:271–83. doi: 10.1016/j.omtm.2023.03.015 (PMC10133875; doi:10.1016/j.omtm.2023.03.015), 2023-04-01
Supplement: mmc1.pdf [file mmc1.pdf]

**OMTM, Volume 29**

**Supplemental information**

**Next-generation poly-L-histidine  
formulations for miRNA mimic delivery**

**Vishal Kasina, Aniket Wahane, Chung-Hao Liu, Lin Yang, Mu-Ping Nieh, Frank J. Slack, and Raman Bahal**

## SAXS MODELS

Scattering intensity,  $I(q)$ , of a particulate system can be expressed by the multiplication of volumetric concentration,  $c_{lp}$ , a contrast factor,  $\Delta\rho^2$ , form factor  $P(q)$  and a structure factor  $S(q)$  as

$$I(q) \propto c_{lp} \cdot \Delta\rho^2 \cdot P(q) \cdot S(q)$$

In this study, a core-shell spherical model is chosen for the form factor to analyze the SAXS data of PLGA:PH and PLGA:PH-miR-34a. The best fitting was performed using SasView (<https://www.sasview.org/>). Due to the low concentration,  $S(q)$  is set to be unity.

### **Core-shell spherical model (form factor):**

The intensity  $I(q)$  for the core-shell spherical is given by:

$$I(q) = \frac{scale}{V} \times F(q)^2 + background,$$

where

$$F(q) = \frac{3}{V_s} \left[ V_c(\rho_c - \rho_s) \frac{\sin(qR_c) - qR_c \cos(qR_c)}{(qR_c)^3} + V_s(\rho_s - \rho_{solv}) \frac{\sin(qR_s) - qR_s \cos(qR_s)}{(qR_s)^3} \right],$$

where  $V_s$  and  $V_c$  are the volume of the whole particle and core, respectively.  $R_s$  and  $R_c$  are the radius of particles (radius plus thickness) and core radius, respectively.  $\rho_c$ ,  $\rho_s$ ,  $\rho_{solv}$  are the scattering length density of the core, the shell and the solvent, respectively.

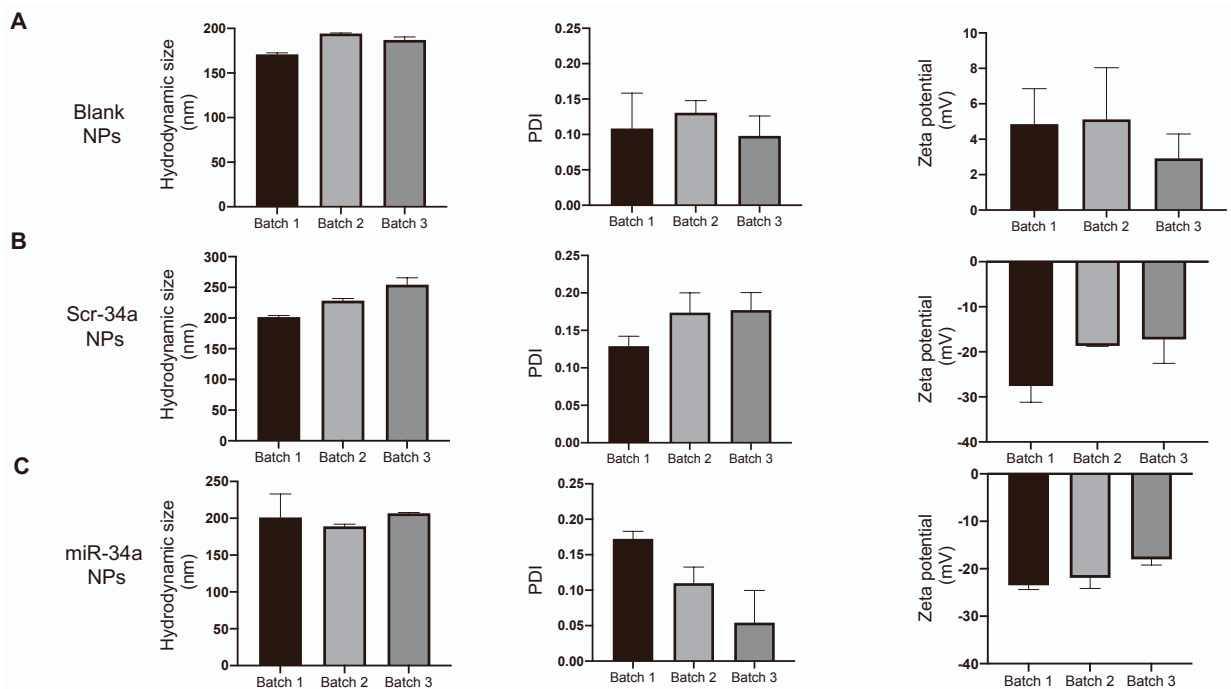

**Figure S1. Nanoparticle characterization of different batches. A)** Blank NP hydrodynamic size (in nm), polydispersity index (PDI), and surface charge density (in mV). Data is shown as mean  $\pm$  SD for n=3 samples. **B)** Scr-34a NP hydrodynamic size (in nm), polydispersity index (PDI), and surface charge density (in mV). Data is shown as mean  $\pm$  SD for n=3 samples. **C)** miR-34a NP hydrodynamic size (in nm), polydispersity index (PDI), and surface charge density (in mV). Data is shown as mean  $\pm$  SD for n=3 samples.

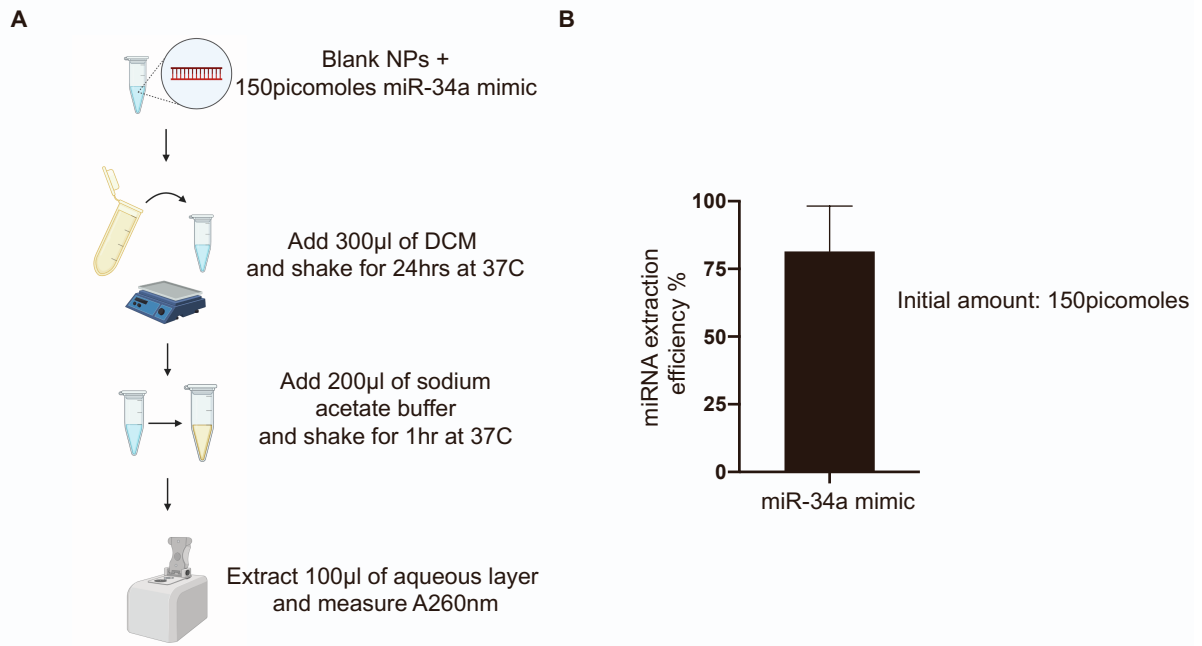

**Figure S2: miRNA mimic extraction efficiency.** A) Schematic representing the method used to quantify the miRNA mimic in the DCM/sodium acetate buffer mixture. B) miRNA extraction efficiency % when starting with 150 picomoles of miR-34a mimic.

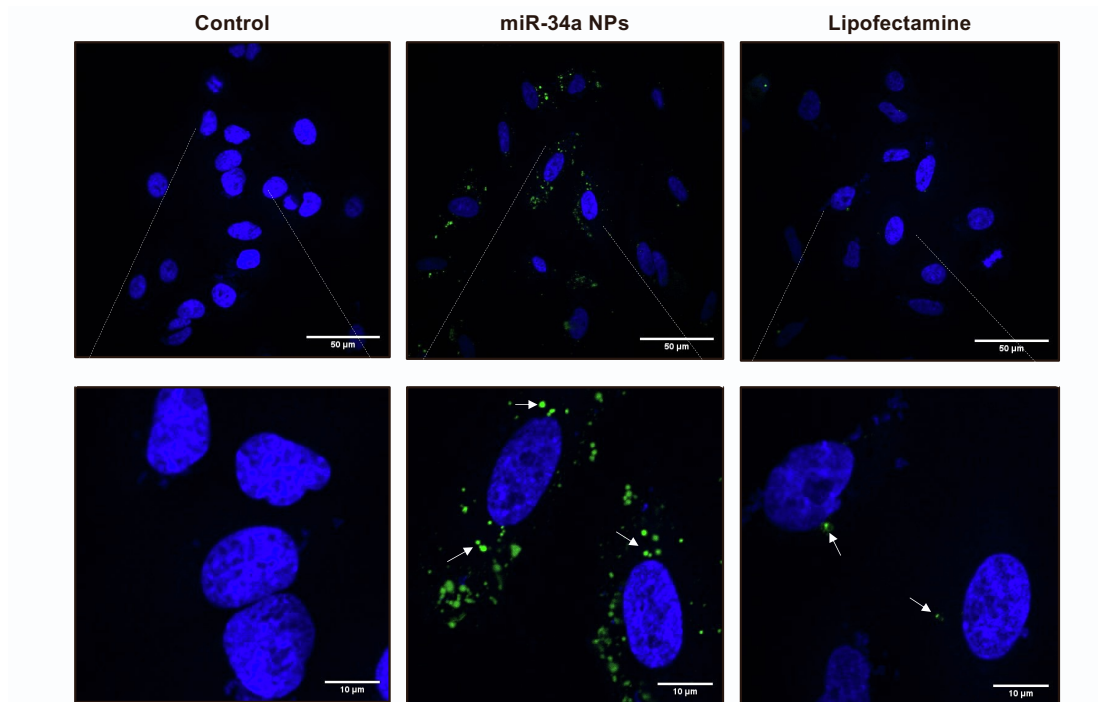

**Figure S3. Comparative cellular uptake of miR-34a-FITC in NPs and lipofectamine in A549 cells using confocal microscopy.** Cells were treated at an equivalent dose of 300 picomoles of miR-34a-FAM mimic. Green puncta represent miR-34a-FITC undergoing cellular uptake. Blue represents nuclei. The images were taken at 60X and 100X magnification. The scale bar represents 50μm and 10μm for 60X and 100X images respectively.

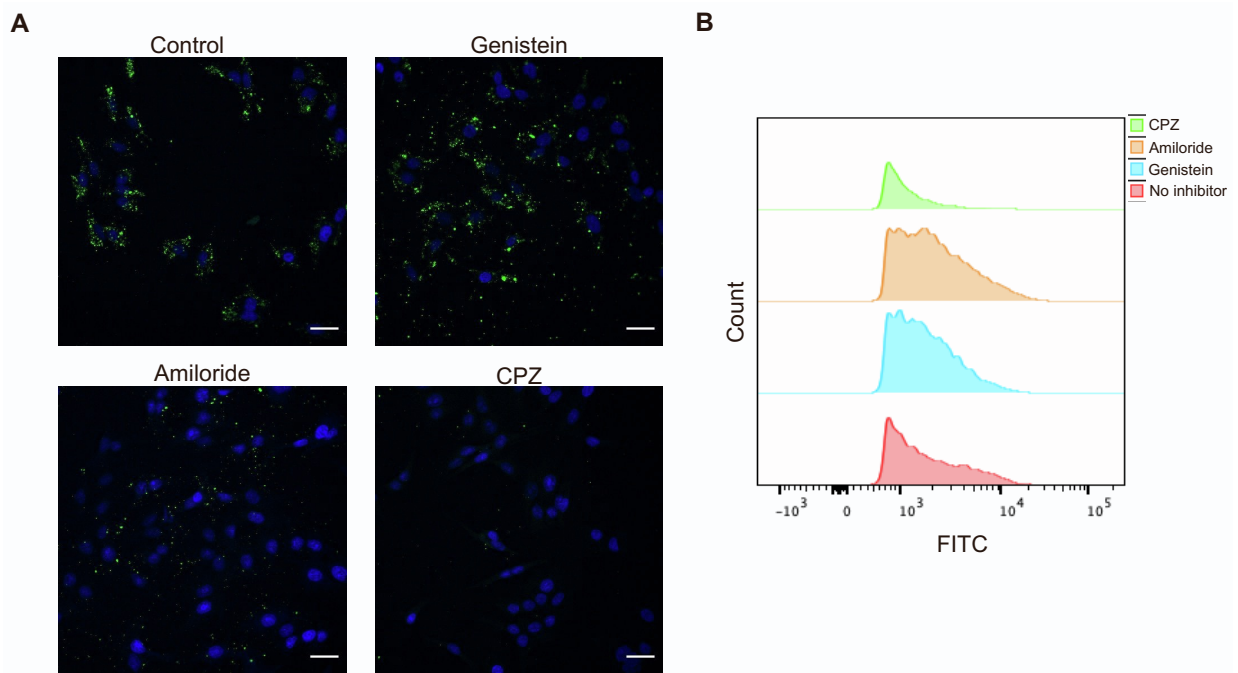

**Figure S4: Route of endocytosis of miR-34a NPs** A) Endocytosis of miR-34a NPs using confocal microscopy. A549 cells were pre-treated with genistein, amiloride, and chlorpromazine (CPZ) for 30min. a 2mg/mL NP dose of miR-34a-FITC NPs was used. Images were taken at 40X magnification, and the scale bar represents 50 $\mu$ m. Green puncta represent miR-34a-FITC NPs. Blue represents nuclei. B) Endocytosis of miR-34a NPs using flow cytometry. Histogram showing cellular uptake when treated with different endocytosis inhibitors. FlowJo used for quantification of data.

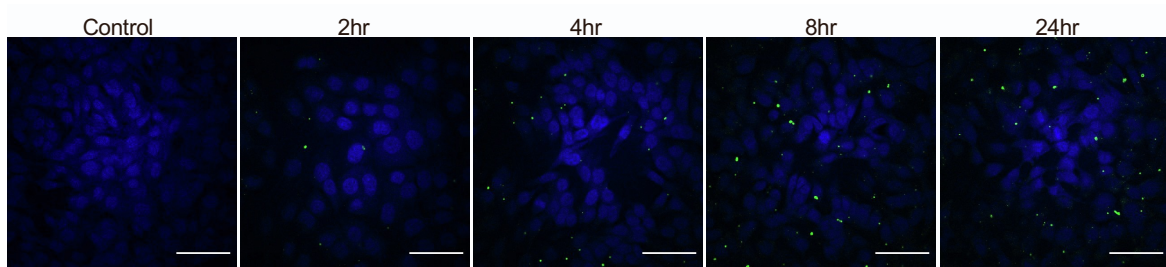

**Figure S5. Time-dependent cellular uptake of miR-34a NPs.** Cells were treated with miR-34a-FITC NPs for 2hr, 4hr, 6hr, and 24hrs. The scale bar represents 50 $\mu$ m. Green puncta represent miR-34a-FITC NPs. Blue represents nuclei.

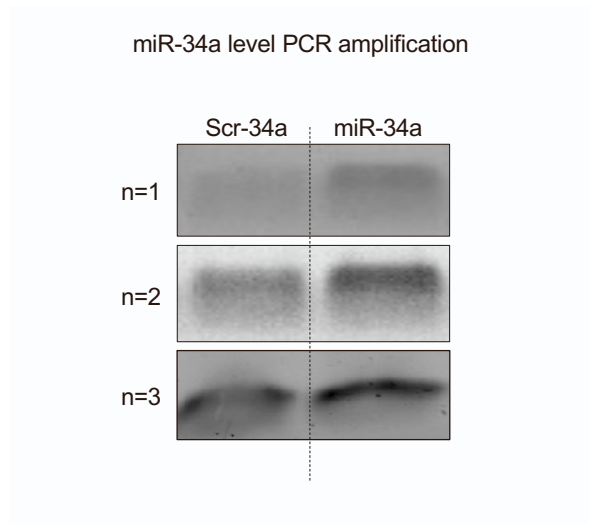

**Figure S6. Agarose gel of miR-34a PCR amplification.** Blot intensities show the relative miR-34a levels comparing Scr-34a NPs and miR-34a NP treatment. Data is shown for n=3 replicates



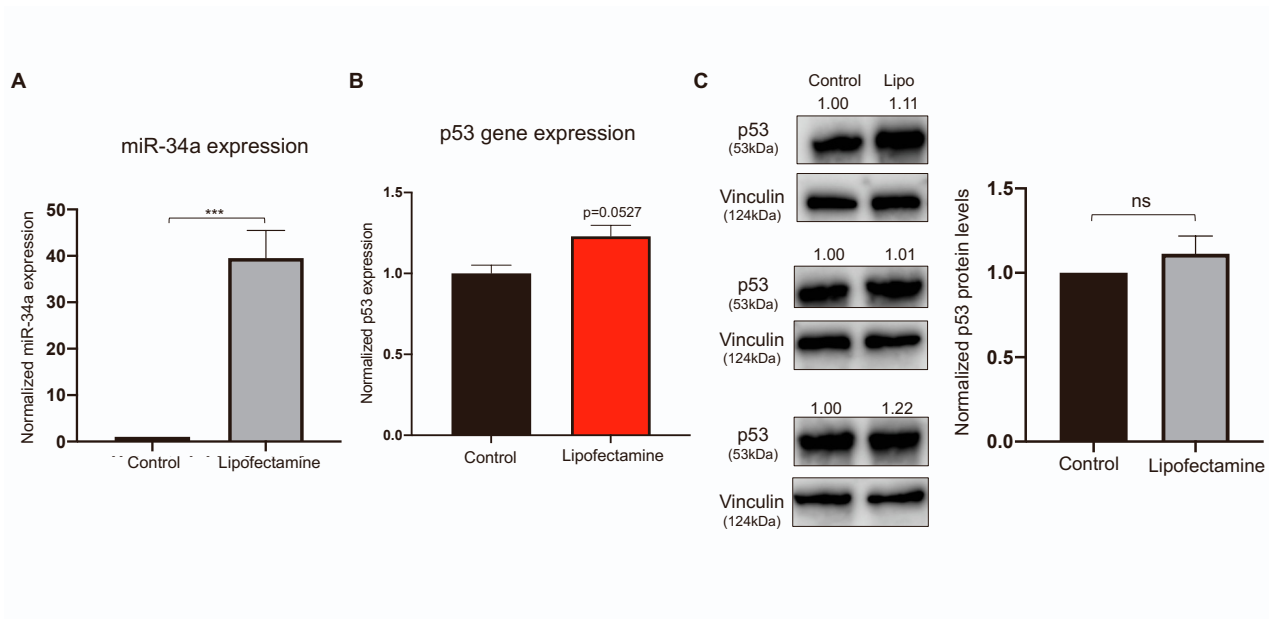

**Figure S7. Functional analysis of A549 cells treated with Lipofectamine-transfected miR-34a mimic.** A) miR-34a expression using RT-PCR when transfected with miR-34a mimic. Data is shown as mean  $\pm$  SD. B) p53 gene expression using RT-PCR when transfected with 600 picomoles of miR-34a mimic. Data is shown as mean  $\pm$  SD. C) p53 protein levels when transfected with miR-34a mimic. Blot intensities are shown above the blot and were quantified using ImageJ software. Unpaired student's t-test was used to determine statistical significance. \*,  $p < 0.05$ .

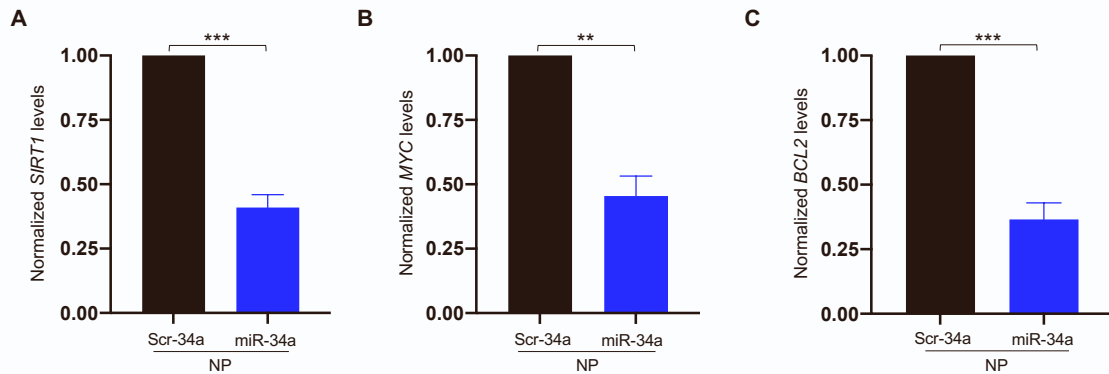

**Figure S8. Gene expression of miR-34a direct targets.** **A)** *SIRT1* gene expression in A549 cells after treated with Scr-34a NPs and miR-34a NPs for 24hrs at a 2mg/ml dose. Data is shown as mean  $\pm$  SD for n=3 samples. **B)** *MYC* gene expression in A549 cells after treated with Scr-34a NPs and miR-34a NPs for 24hrs at a 2mg/ml dose. Data is shown as mean  $\pm$  SD for n=3 samples. **C)** *BCL2* gene expression in A549 cells after treated with Scr-34a NPs and miR-34a NPs for 24hrs at a 2mg/ml dose. Data is shown as mean  $\pm$  SD for n=3 samples. Unpaired student's t-test was used to determine statistical significance. \*\*,  $p < 0.01$ ; \*\*\*,  $p < 0.001$ .

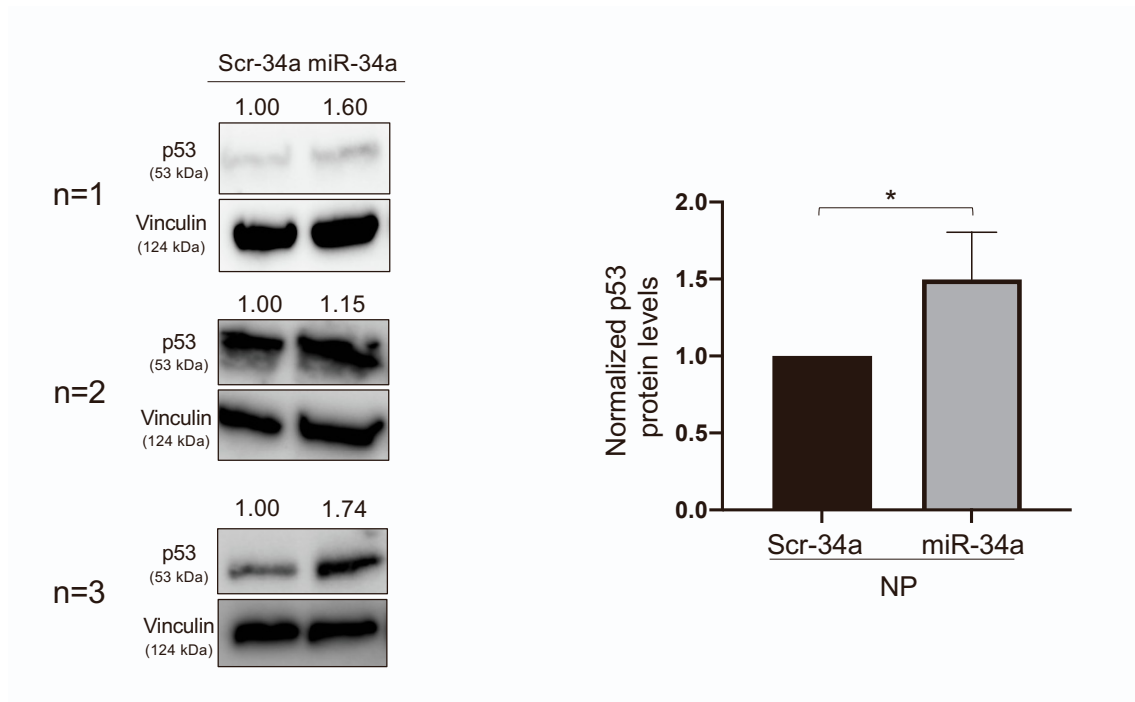

**Figure S9. Western blot analysis of p53 protein from A549 cells treated with Scr-34a NPs and miR-34a NPs for 24hrs at a 2mg/mL dose.** p53 protein levels are normalized to Vinculin levels. Data represent the mean (n=3)  $\pm$  SD. Protein blots indicate protein intensity based on pixels per band, quantified using ImageJ. Unpaired student's t-test was used to determine statistical significance. The n=1 blot is shown in Figure 3E. \*,  $p < 0.05$ .

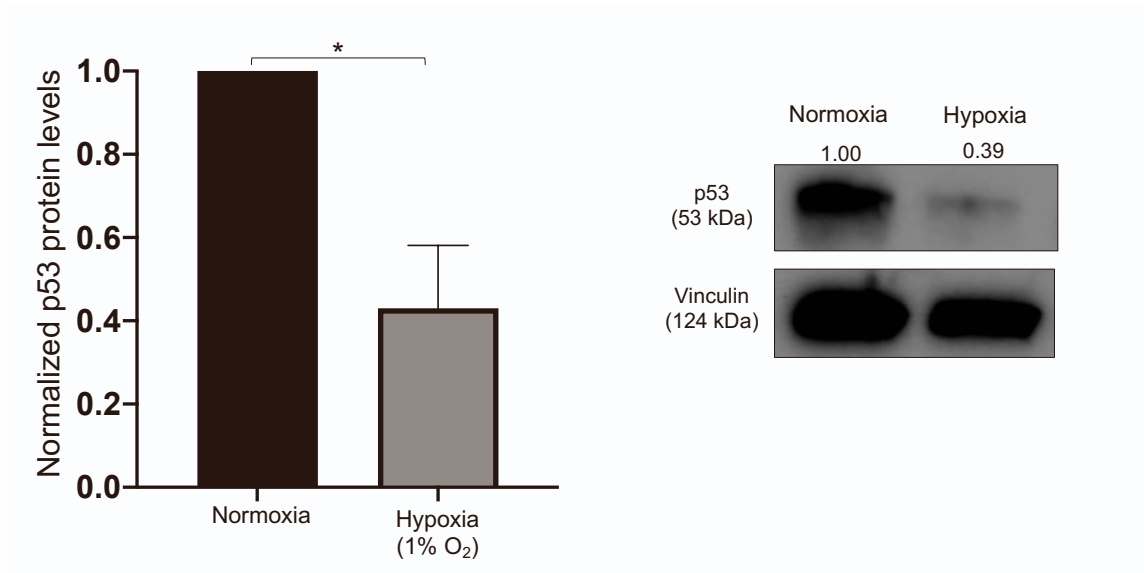

**Figure S10. Western blot analysis showing baseline p53 protein levels in hypoxia conditions.** Data is represented as mean  $\pm$  SD (n=3) and normalized to p53 protein levels in Normoxia conditions. Blot intensities were quantified using ImageJ software based on pixels per band. Unpaired student's t-test was used to determine statistical significance. \*,  $p < 0.05$ .

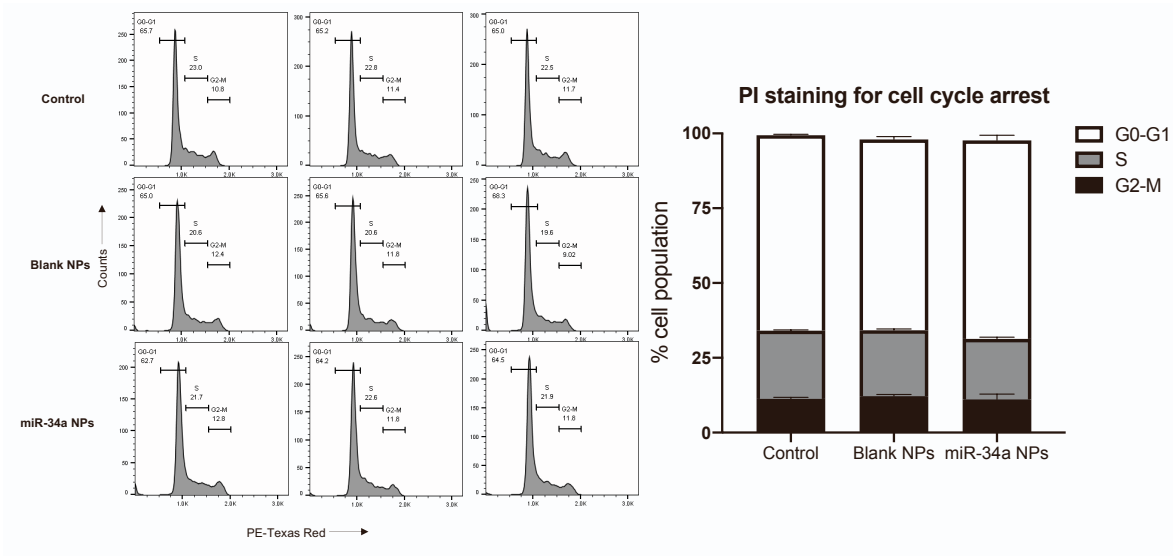

**Figure S11. Cell cycle arrest assay using propidium iodide staining.** Individual histograms from flow cytometry analysis to quantify cell cycle changes following treatment with miR-34a NPs and BL NPs after 24hrs in A549 cells at a 2mg/mL dose. Cells were stained with propidium iodide and histograms were gated to identify cell populations at different cell cycle phases. Percentage cell populations in G0-G1, S and G2-M phases were plotted. Data represent the mean ( $n=3$ )  $\pm$  SD.

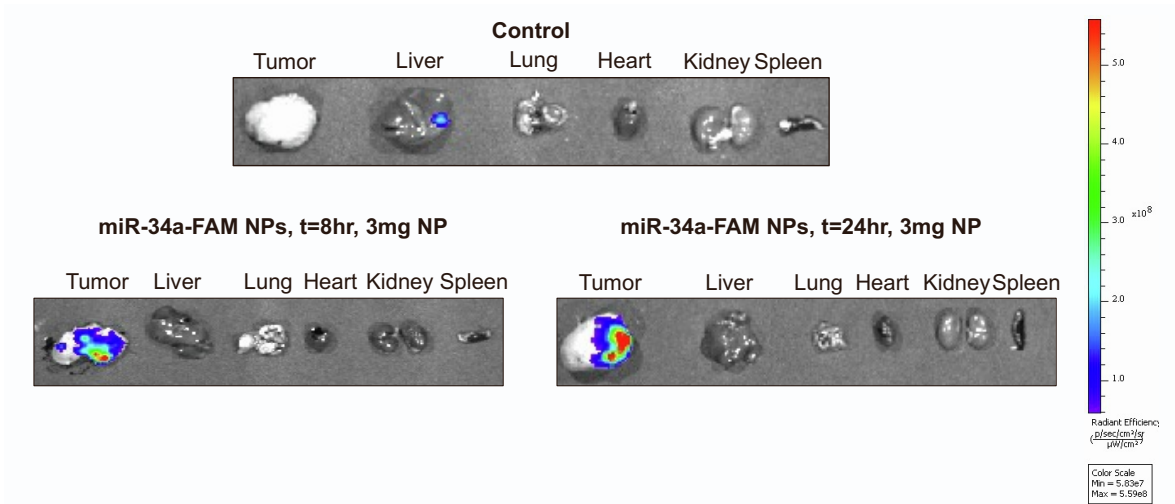

**Figure S12: Intratumoral biodistribution of miR-34a-FAM NPs in harvested organs.** The images presented are of the tumor, liver, lung, heart, kidney, and spleen and were taken using the Spectrum CT IVIS imager. The mice were treated with miR-34a-FAM NPs at a 3mg NP dose for 8hrs and 24hrs.

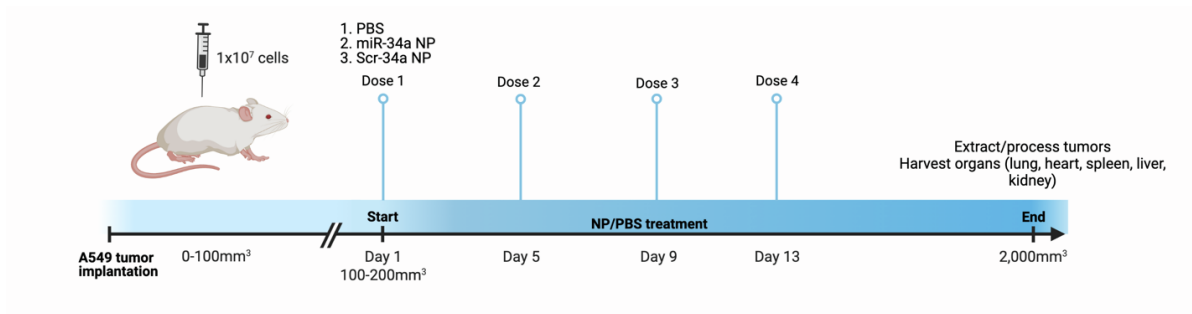

**Figure S13. Workflow for *in vivo* efficacy studies in A549 xenograft mice.** Mice were treated with PBS, miR-34a NPs, and Scr-34a NPs intratumorally on Day 1, 5, 9, and 13 with 3mg of NPs. Tumor dimensions were recorded daily to measure volume. After the tumors reached 2,000mm<sup>3</sup>, the tumors were processed and the lungs, heart, spleen, liver, and kidney were harvested.

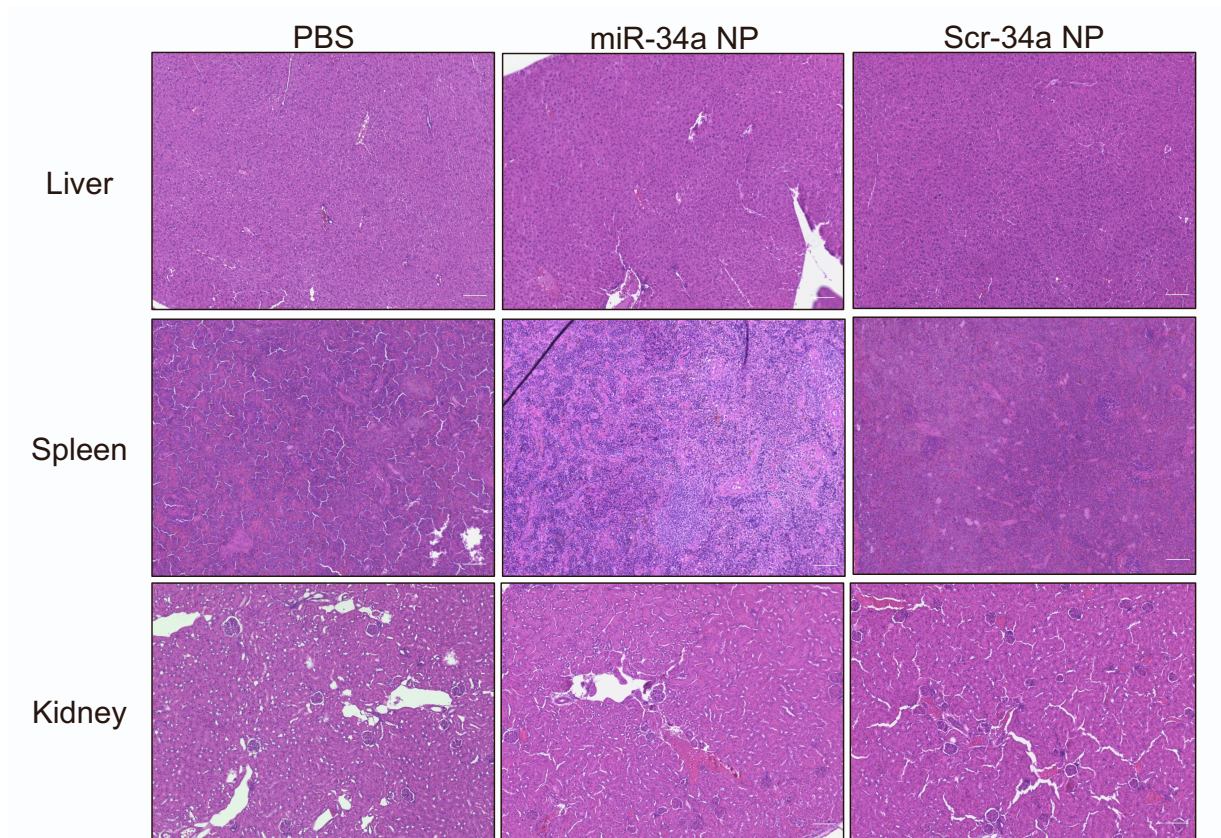

**Figure S14. H&E staining of liver, kidney and spleen after intratumoral administration of PBS, miR-34a NP, and Scr-34a NP. A 3mg NP dose was injected intratumorally. Images were taken at 10X magnification. The scale bar represents 100 $\mu$ m.**
